# Supplementary material for: Comprehensive analyses of immune tumor microenvironment in papillary renal cell carcinoma
Source: PubMed Central journal article supplement — J Immunother Cancer. 2023 Nov 7;11(11):e006885. doi: 10.1136/jitc-2023-006885 (PMC10649801; doi:10.1136/jitc-2023-006885), 2023-11-07
Supplement: jitc-2023-006885supp001.pdf [file jitc-2023-006885supp001.pdf]

## Supplementary figure legends

**Figure S1. Additional analysis from TCGA KIRP Cohort (n=271).** A, Boxplots representing MCP-Counter estimation of different immune cell populations according to clusters. p values were obtained using the two-sided Mann-Whitney test ( $***p<0.001$ ). B, Boxplots representing copy number alterations (CNA) (CDKN2A, Chromosome (chr) 3p and 7 between 2 clusters. p values were obtained using the two-sided Mann-Whitney test ( $**p<0.01$ ; ns: non-significant). C, Boxplots representing gene signature mRNA-based concerning the Cell cycle, Hypoxia, NRF2/ARE, TFE3 fusion, between 2 clusters. p values were obtained using the two-sided Mann-Whitney test ( $***p<0.001$ ). D, Boxplots representing the Th2 prognostic signature according to the clusters from MCP-Counter ( $***p<0.001$ ).

**Figure S2. Transcriptomic analyses from independent Albiges *et al.* cohort (n=98).** A, Heatmap representing unsupervised analysis from MCP-Counter on the microarray expression data (k=2), identifying the TME subtypes. B, Boxplots representing the expression of 5 checkpoint markers according to clusters from the MCP-Counter analysis. C, Boxplots representing the 3 predictive gene signatures of response to treatment described in the clear-cell renal cell carcinoma (angiogenesis, Effector T-cell (Eff T), JAVELIN Renal 101 Immuno), according to the clusters from MCP-Counter. p values were obtained using the two-sided Mann-Whitney test ( $**p<0.01$ ;  $***p<0.001$ ).

**Figure S3. Additional heatmap from AXIPAP trial cohort (n=38).** Heatmap representing unsupervised analysis based on the immune markers performed in immunohistochemistry (k=2), identifying the “IHC TME subtypes” with the “immune-enriched” group and the “immune-low” group, annotated histological type and angiogenic markers, CD31(AV: vascular architecture; DV: vascular density) and VEGF.

**Figure S4. Assessment of response to treatment from AXIPAP trial cohort (n=38).** A, table with objective response rate (ORR) of patients treated with axitinib in 1st line, from AXIPAP trial cohort, according to subgroups from the unsupervised analysis based on IHC immune markers from AXIPAP trial cohort (n=36). B, table with objective response rate (ORR) of patients treated by immunotherapy in 2<sup>nd</sup> or 3<sup>rd</sup> line, according to subgroups from the unsupervised analysis based on IHC immune markers from AXIPAP trial cohort (n=12). C, Boxplots representing the 3 predictive gene signatures of response to treatment described in the clear-cell renal cell carcinoma, (angiogenesis, Effector T-cell (Eff T), JAVELIN Renal 101 Immuno), according to subgroups from the unsupervised analysis based on IHC immune markers from AXIPAP trial cohort (n=30). p values were obtained using the two-sided Mann-Whitney test ( $*p<0.05$ ; ns: non-significant).

**Figure S5. Gene ontology (GO) terms analysis.** A, The bubble diagram representing Biological Process significantly activated between the clusters from MCP-Counter in TCGA cohort. B, The bubble diagram representing Biological Process significantly activated between subgroups from the unsupervised analysis based on IHC immune markers in AXIPAP trial cohort.
