# Supplementary material for: Comprehensive analyses of immune tumor microenvironment in papillary renal cell carcinoma
Source: PubMed Central journal article supplement — J Immunother Cancer. 2023 Nov 7;11(11):e006885. doi: 10.1136/jitc-2023-006885 (PMC10649801; doi:10.1136/jitc-2023-006885), 2023-11-07

## Figure S4

### A

| Sub group                | Partial response | Stable disease | Progression disease | Not known | Objective response rate (22%) |
|--------------------------|------------------|----------------|---------------------|-----------|-------------------------------|
| <b>“immune-enriched”</b> | 2                | 10             | 4                   | 2         | 11%                           |
| <b>“immune-low”</b>      | 6                | 14             | 0                   | 0         | <b>30%</b>                    |

### B

| Sub group                | Partial response | Stable disease | Progression disease | Not known | Objective response rate (22%) |
|--------------------------|------------------|----------------|---------------------|-----------|-------------------------------|
| <b>“immune-enriched”</b> | 1                | 0              | 1                   | 0         | <b>33%</b>                    |
| <b>“immune-low”</b>      | 0                | 3              | 7                   | 2         | 0%                            |

### C

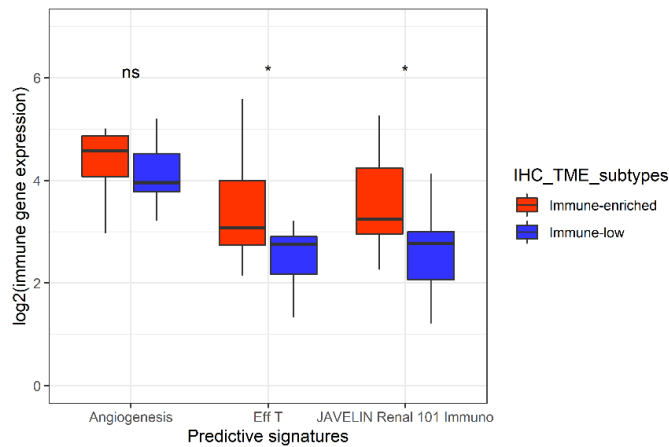

Supplement: jitc-2023-006885supp005.pdf [file jitc-2023-006885supp005.pdf]
