# Supplementary figures and images for: Comprehensive analyses of immune tumor microenvironment in papillary renal cell carcinoma
Source: PubMed Central journal article supplement — J Immunother Cancer. 2023 Nov 7;11(11):e006885. doi: 10.1136/jitc-2023-006885 (PMC10649801; doi:10.1136/jitc-2023-006885), 2023-11-07

## Figure S1

### A

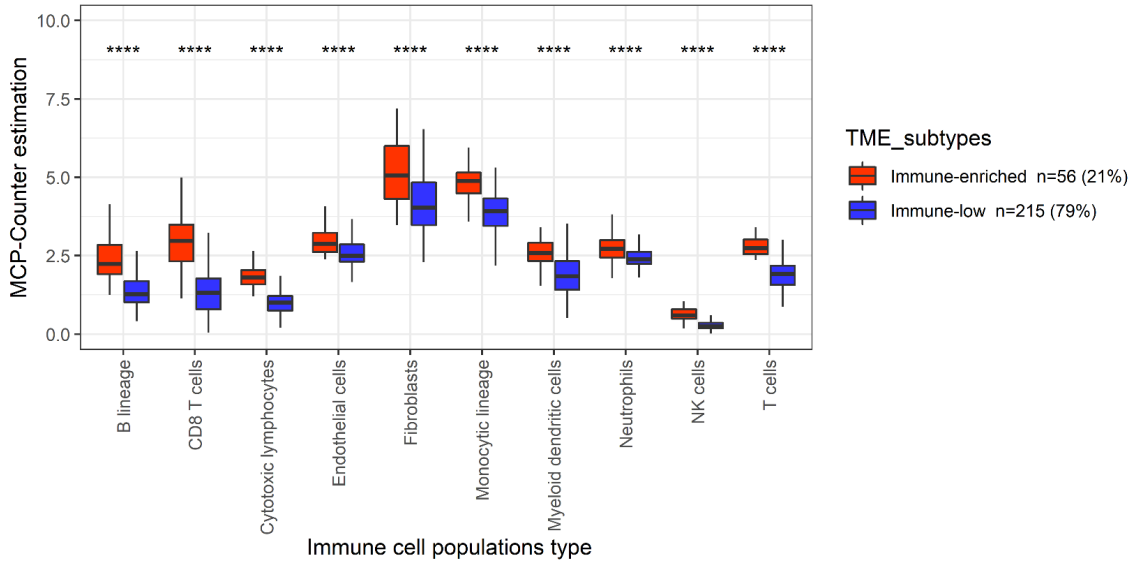

### B

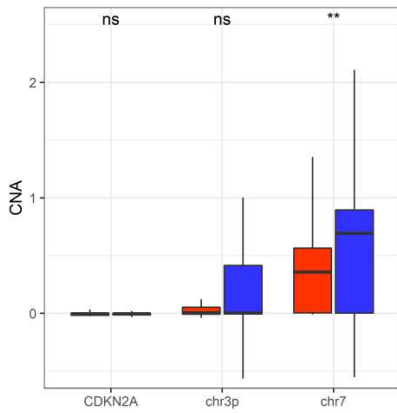

### D

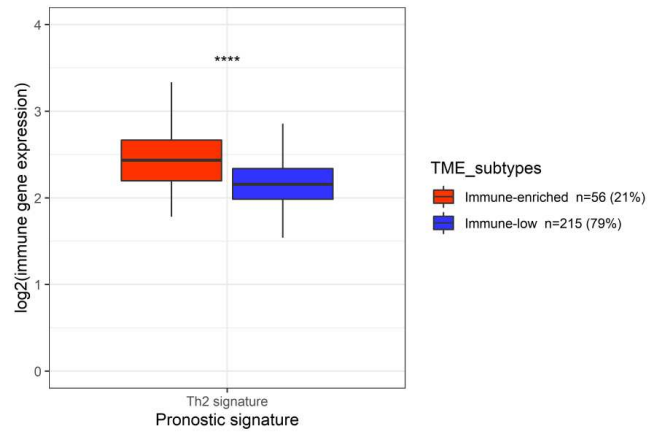

### C

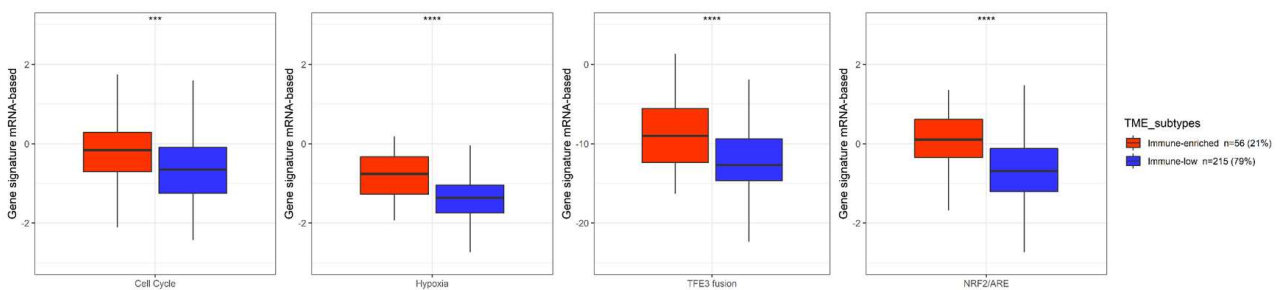

Supplement: jitc-2023-006885supp002.pdf [file jitc-2023-006885supp002.pdf]

**Figure S2**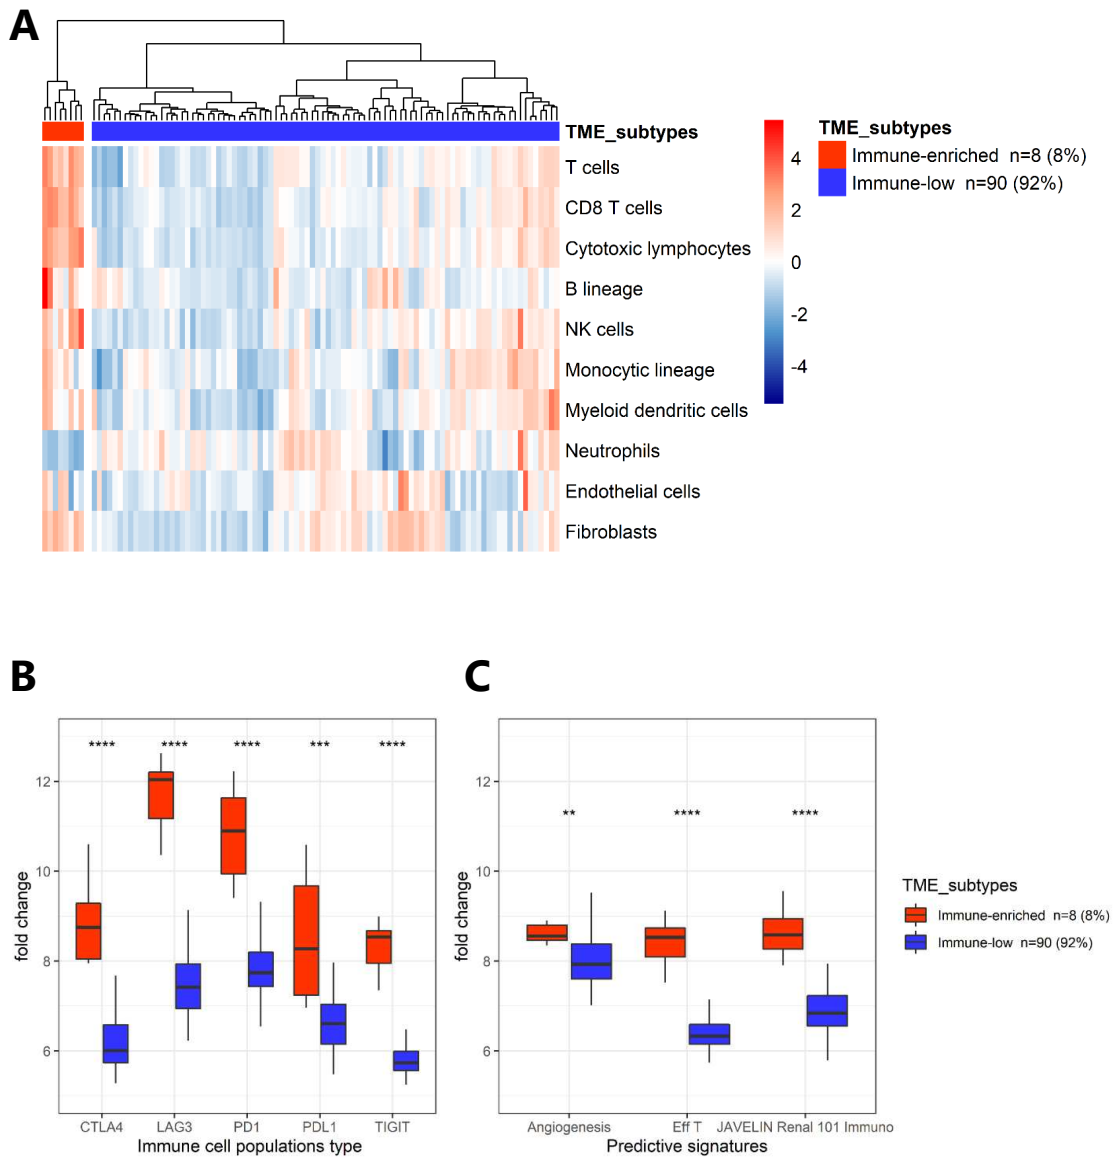

Supplement: jitc-2023-006885supp003.pdf [file jitc-2023-006885supp003.pdf]

**Figure S3**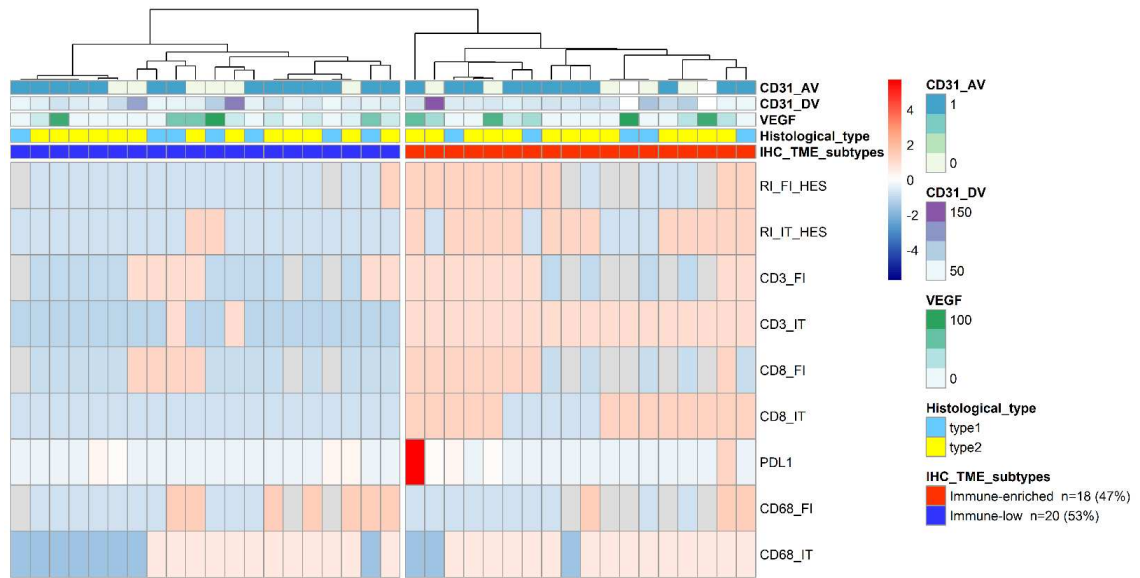

Supplement: jitc-2023-006885supp004.pdf [file jitc-2023-006885supp004.pdf]

# Figure S5

**A**

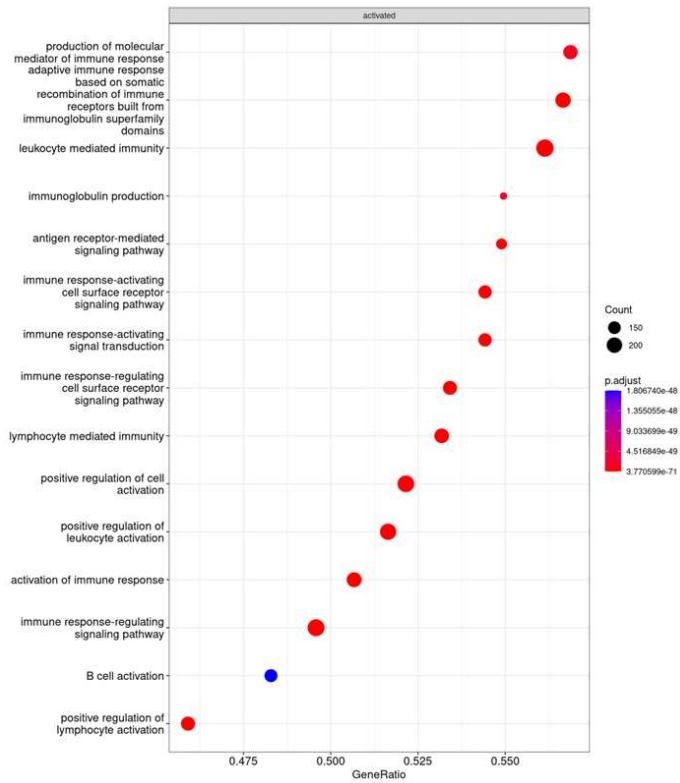

**B**

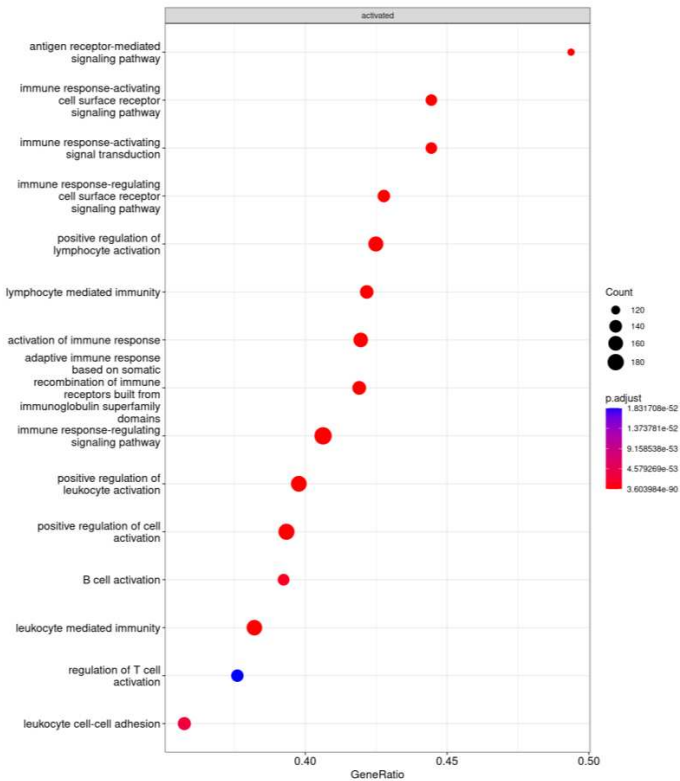

Supplement: jitc-2023-006885supp006.pdf [file jitc-2023-006885supp006.pdf]
